# Supplementary material for: Influence of Parental Health Literacy on Change over Time in the Oral Health of American Indian Children
Source: MDPI journal article supplement (doi:10.3390/ijerph18115633), 2021-05-25
Supplement: s1 [file s1]

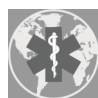

**Table S1.** Differences in Change over Time by Treatment Group <sup>1</sup>

| Oral Health Construct                             | Group * Time<br>Interaction Estimate<br>(95% CI) | P Value      |
|---------------------------------------------------|--------------------------------------------------|--------------|
| <b>Parental Oral Health Knowledge</b>             |                                                  | <b>0.022</b> |
| Group * 12 Months                                 | 3.11 (0.93, 5.30)                                | 0.005        |
| Group * 24 Months                                 | 2.29 (-0.29, 4.87)                               | 0.082        |
| Group * 36 Months                                 | 0.77 (-1.66, 3.21)                               | 0.532        |
| <b>Parental Oral Health Beliefs</b>               |                                                  |              |
| <b>Extended Health Belief Model</b>               |                                                  |              |
| <b>Perceived Susceptibility</b>                   |                                                  | <b>0.159</b> |
| Group * 12 Months                                 | -0.13 (-0.33, 0.06)                              | 0.184        |
| Group * 24 Months                                 | 0.10 (-0.09, 0.30)                               | 0.306        |
| Group * 36 Months                                 | -0.02 (-0.23, 0.20)                              | 0.889        |
| <b>Perceived Severity</b>                         |                                                  | <b>0.334</b> |
| Group * 12 Months                                 | 0.07 (-0.07, 0.21)                               | 0.347        |
| Group * 24 Months                                 | -0.01 (-0.16, 0.14)                              | 0.890        |
| Group * 36 Months                                 | 0.12 (-0.04, 0.28)                               | 0.146        |
| <b>Perceived Barriers</b>                         |                                                  | <b>0.999</b> |
| Group * 12 Months                                 | -0.01 (-0.17, 0.15)                              | 0.900        |
| Group * 24 Months                                 | -0.01 (-0.17, 0.16)                              | 0.934        |
| Group * 36 Months                                 | -0.01 (-0.17, 0.16)                              | 0.925        |
| <b>Perceived Benefits</b>                         |                                                  | <b>0.770</b> |
| Group * 12 Months                                 | 0.02 (-0.14, 0.19)                               | 0.775        |
| Group * 24 Months                                 | -0.04 (-0.20, 0.11)                              | 0.585        |
| Group * 36 Months                                 | 0.03 (-0.13, 0.20)                               | 0.697        |
| <b>Self-efficacy</b>                              |                                                  | <b>0.951</b> |
| Group * 12 Months                                 | 0.16 (-0.50, 0.82)                               | 0.631        |
| Group * 24 Months                                 | 0.00 (-0.75, 0.76)                               | 0.993        |
| Group * 36 Months                                 | 0.09 (-0.66, 0.83)                               | 0.821        |
| <b>Locus of Control (LOC)</b>                     |                                                  |              |
| <b>Internal LOC</b>                               |                                                  | <b>0.742</b> |
| Group * 12 Months                                 | 0.04 (-0.14, 0.22)                               | 0.688        |
| Group * 24 Months                                 | 0.06 (-0.12, 0.25)                               | 0.509        |
| Group * 36 Months                                 | -0.03 (-0.22, 0.16)                              | 0.761        |
| <b>External LOC-Powerful Others</b>               |                                                  | <b>0.043</b> |
| Group * 12 Months                                 | -0.22 (-0.41, -0.04)                             | 0.017        |
| Group * 24 Months                                 | -0.21 (-0.40, -0.02)                             | 0.032        |
| Group * 36 Months                                 | -0.09 (-0.29, 0.12)                              | 0.401        |
| <b>External LOC-Chance</b>                        |                                                  | <b>0.436</b> |
| Group * 12 Months                                 | -0.12 (-0.30, 0.06)                              | 0.201        |
| Group * 24 Months                                 | -0.01 (-0.20, 0.18)                              | 0.919        |
| Group * 36 Months                                 | -0.10 (-0.30, 0.09)                              | 0.291        |
| <b>Parental Oral Health Behavior <sup>2</sup></b> |                                                  | <b>0.927</b> |
| Group * 24 Months                                 | -0.04 (-3.73, 3.65)                              | 0.984        |
| Group * 36 Months                                 | 0.60 (-3.18, 4.37)                               | 0.757        |
| <b>Pediatric Oral Health Outcomes</b>             |                                                  |              |
| <b>Oral Health Status</b>                         |                                                  | <b>0.468</b> |
| Group * 12 Months                                 | -0.10 (-0.31, 0.11)                              | 0.335        |
| Group * 24 Months                                 | -0.05 (-0.30, 0.21)                              | 0.722        |

| Oral Health Construct                         | Group * Time<br>Interaction Estimate<br>(95% CI) | P Value |
|-----------------------------------------------|--------------------------------------------------|---------|
| Group * 36 Months<br><b>Dmfs</b> <sup>2</sup> | -0.17 (-0.44, 0.09)                              | 0.194   |
| Group * 24 Months                             | 1.12 (0.53, 2.37)                                | 0.769   |
| Group * 36 Months                             | 1.03 (0.49, 2.18)                                | 0.940   |

<sup>1</sup> For each construct, the table displays estimates of the treatment group by time interaction comparing each time point to the reference time point and reference group (control group). Unless otherwise specified, the reference time point is baseline. Also displayed are 95% confidence intervals (CI), p values for the comparison to the reference value, and overall p values for the time by group interaction. Models were adjusted for parental age and income at baseline as well as child's gender. <sup>2</sup> Exponentiated estimate from generalized linear mixed model with negative binomial distribution is presented. Because behavior items collected at baseline differed from those collected at the follow-up time points, we excluded baseline behavioral data and used 12-month data as the reference value. Given that children were enrolled as newborns, dental evaluations were not conducted at baseline. Hence, dmfs data from the 12-month visit served as the reference value.

**Table S2.** Baseline Health Literacy (HL) as a Predictor of Change over Time in the Oral Health Constructs – Complete Results <sup>1</sup>.

| Oral Health Construct                                  | Adjusted HL<br>Z-score Estimate<br>(95% CI) | P<br>value | Adjusted Time<br>Estimate (Δ)<br>(95% CI) | P value      | Adjusted HL Z-<br>score by Time<br>Interaction<br>Estimate<br>(95% CI) | P value      |
|--------------------------------------------------------|---------------------------------------------|------------|-------------------------------------------|--------------|------------------------------------------------------------------------|--------------|
| <b>Parental Oral Health<br/>Knowledge</b> <sup>2</sup> | 3.72 (2.67, 4.76)                           | <0.001     |                                           | <0.001       |                                                                        | <b>0.326</b> |
| 12 Months                                              |                                             |            | 4.92 (3.37, 6.46)                         | <0.001       | -0.84 (-1.97, 0.28)                                                    | 0.142        |
| 24 Months                                              |                                             |            | 4.84 (3.00, 6.67)                         | <0.001       | -1.18 (-2.54, 0.17)                                                    | 0.087        |
| 36 Months                                              |                                             |            | 5.28 (3.54, 7.02)                         | <0.001       | -0.64 (-1.93, 0.64)                                                    | 0.325        |
| <b>Parental Oral Health<br/>Beliefs</b>                |                                             |            |                                           |              |                                                                        |              |
| <b>Extended Health Belief<br/>Model</b>                |                                             |            |                                           |              |                                                                        |              |
| <b>Perceived Susceptibility</b>                        | -0.19 (-0.28, -0.10)                        | <0.001     |                                           | <b>0.251</b> |                                                                        | <b>0.868</b> |
| 12 Months                                              |                                             |            | -0.09 (-0.19, 0.004)                      | 0.061        | -0.02 (-0.13, 0.08)                                                    | 0.645        |
| 24 Months                                              |                                             |            | -0.05 (-0.15, 0.05)                       | 0.356        | -0.03 (-0.13, 0.07)                                                    | 0.593        |
| 36 Months                                              |                                             |            | -0.02 (-0.12, 0.09)                       | 0.781        | 0.01 (-0.10, 0.12)                                                     | 0.870        |
| <b>Perceived Severity</b>                              | 0.11 (0.05, 0.18)                           | <0.001     |                                           | <b>0.136</b> |                                                                        | <b>0.374</b> |
| 12 Months                                              |                                             |            | 0.03 (-0.04, 0.10)                        | 0.427        | -0.04 (-0.11, 0.04)                                                    | 0.309        |
| 24 Months                                              |                                             |            | 0.01 (-0.07, 0.08)                        | 0.869        | -0.02 (-0.11, 0.06)                                                    | 0.542        |
| 36 Months                                              |                                             |            | -0.06 (-0.14, 0.02)                       | 0.144        | 0.03 (-0.06, 0.11)                                                     | 0.528        |
| <b>Perceived Barriers</b>                              | -0.24 (-0.31, -0.16)                        | <0.001     |                                           | <b>0.193</b> |                                                                        | <b>0.519</b> |
| 12 Months                                              |                                             |            | 0.03 (-0.05, 0.11)                        | 0.414        | 0.05 (-0.03, 0.14)                                                     | 0.213        |
| 24 Months                                              |                                             |            | 0.02 (-0.07, 0.10)                        | 0.720        | 0.06 (-0.03, 0.15)                                                     | 0.169        |
| 36 Months                                              |                                             |            | 0.08 (-0.002, 0.17)                       | 0.056        | 0.05 (-0.04, 0.14)                                                     | 0.245        |
| <b>Perceived Benefits</b>                              | 0.12 (0.06, 0.18)                           | <0.001     |                                           | <b>0.343</b> |                                                                        | <b>0.529</b> |
| 12 Months                                              |                                             |            | 0.05 (-0.03, 0.14)                        | 0.232        | 0.00 (-0.09, 0.08)                                                     | 0.927        |
| 24 Months                                              |                                             |            | 0.05 (-0.03, 0.13)                        | 0.181        | -0.05 (-0.13, 0.03)                                                    | 0.251        |
| 36 Months                                              |                                             |            | 0.07 (-0.01, 0.16)                        | 0.082        | -0.05 (-0.13, 0.04)                                                    | 0.282        |
| <b>Self-efficacy</b>                                   | 0.92 (0.61, 1.24)                           | <0.001     |                                           | <b>0.428</b> |                                                                        | <b>0.581</b> |
| 12 Months                                              |                                             |            | 0.18 (-0.16, 0.51)                        | 0.302        | -0.21 (-0.56, 0.13)                                                    | 0.225        |
| 24 Months                                              |                                             |            | -0.09 (-0.47, 0.29)                       | 0.632        | -0.02 (-0.42, 0.37)                                                    | 0.917        |
| 36 Months                                              |                                             |            | -0.03 (-0.41, 0.35)                       | 0.865        | -0.06 (-0.45, 0.34)                                                    | 0.779        |

| Oral Health Construct                            | Adjusted HL Z-score Estimate (95% CI) | P value          | Adjusted Time Estimate (Δ) (95% CI) | P value          | Adjusted HL Z-score by Time Interaction Estimate (95% CI) | P value          |
|--------------------------------------------------|---------------------------------------|------------------|-------------------------------------|------------------|-----------------------------------------------------------|------------------|
| <b>Locus of control (LOC)</b>                    |                                       |                  |                                     |                  |                                                           |                  |
| <b>Internal LOC</b>                              | 0.09 (0.01, 0.16)                     | <b>&lt;0.001</b> |                                     | <b>0.013</b>     |                                                           | <b>0.770</b>     |
| 12 Months                                        |                                       |                  | 0.14 (0.04, 0.23)                   | 0.003            | 0.00 (-0.09, 0.09)                                        | 0.978            |
| 24 Months                                        |                                       |                  | 0.03 (-0.06, 0.12)                  | 0.525            | 0.04 (-0.06, 0.14)                                        | 0.404            |
| 36 Months                                        |                                       |                  | 0.05 (-0.05, 0.14)                  | 0.303            | 0.03 (-0.07, 0.13)                                        | 0.602            |
| <b>External LOC-Powerful Others<sup>2</sup></b>  | -0.25 (-0.34, -0.15)                  | <b>&lt;0.001</b> |                                     | <b>&lt;0.001</b> |                                                           | <b>0.407</b>     |
| 12 Months                                        |                                       |                  | -0.35 (-0.48, -0.22)                | <0.001           | 0.01 (-0.08, 0.11)                                        | 0.762            |
| 24 Months                                        |                                       |                  | -0.46 (-0.59, -0.32)                | <0.001           | 0.08 (-0.02, 0.18)                                        | 0.110            |
| 36 Months                                        |                                       |                  | -0.36 (-0.50, -0.21)                | <0.001           | 0.04 (-0.07, 0.15)                                        | 0.441            |
| <b>External LOC-Chance</b>                       | -0.29 (-0.38, -0.20)                  | <b>&lt;0.001</b> |                                     | <b>0.062</b>     |                                                           | <b>&lt;0.001</b> |
| 12 Months                                        |                                       |                  | -0.01 (-0.10, 0.09)                 | 0.891            | 0.02 (-0.08, 0.11)                                        | 0.736            |
| 24 Months                                        |                                       |                  | -0.11 (-0.21, -0.02)                | 0.019            | 0.22 (0.12, 0.32)                                         | <0.001           |
| 36 Months                                        |                                       |                  | -0.08 (-0.18, 0.02)                 | 0.105            | 0.14 (0.03, 0.24)                                         | 0.009            |
| <b>Parental Oral Health Behavior<sup>3</sup></b> | 2.75 (0.97, 4.53)                     | <b>&lt;0.001</b> |                                     | <b>&lt;0.001</b> |                                                           | <b>0.965</b>     |
| 24 Months                                        |                                       |                  | -7.64 (-9.54, -5.74)                | <0.001           | 0.25 (-1.73, 2.23)                                        | 0.802            |
| 36 Months                                        |                                       |                  | -7.67 (-9.60, -5.73)                | <0.001           | 0.07 (-1.97, 2.10)                                        | 0.950            |
| <b>Pediatric Oral Health Outcomes</b>            |                                       |                  |                                     |                  |                                                           |                  |
| <b>Oral Health Status</b>                        | -0.09 (-0.17, -0.002)                 | <b>0.004</b>     |                                     | <b>&lt;0.001</b> |                                                           | <b>0.747</b>     |
| 12 Months                                        |                                       |                  | 0.30 (0.20, 0.41)                   | <0.001           | -0.05 (-0.16, 0.06)                                       | 0.348            |
| 24 Months                                        |                                       |                  | 0.92 (0.79, 1.04)                   | <0.001           | -0.02 (-0.15, 0.12)                                       | 0.821            |
| 36 Months                                        |                                       |                  | 1.13 (1.00, 1.27)                   | <0.001           | 0.00 (-0.14, 0.14)                                        | 0.970            |
| <b>dmfs<sup>3</sup></b>                          | 1.15 (0.68, 1.95)                     | <b>0.838</b>     |                                     | <b>&lt;0.001</b> |                                                           | <b>0.332</b>     |
| 24 Months                                        |                                       |                  | 15.92 (10.73, 23.61)                | <0.001           | 0.82 (0.54, 1.26)                                         | 0.361            |
| 36 Months                                        |                                       |                  | 67.36 (45.06, 100.68)               | <0.001           | 0.73 (0.48, 1.12)                                         | 0.147            |

<sup>1</sup> For each oral health construct, the table displays the estimate of the health literacy z-score by time interaction comparing each time point to the reference time point. Unless otherwise specified, the reference time point is baseline. Also displayed are 95% confidence intervals (CI), p values for the comparison of each time point to the reference value, and overall p values across all time points. Models were adjusted for parent's age and income at baseline as well as child's gender. <sup>2</sup>

Because these constructs showed significant treatment group by time interactions, the final models for these constructs included treatment group and the interaction of treatment group by time as covariates. <sup>3</sup> Exponentiated estimate from generalized linear mixed model with negative binomial distribution is presented. Because behavior items collected at baseline differed from those collected at the follow-up time points, we excluded baseline behavioral data and used 12-month data as the reference value. Given that children were enrolled as newborns, dental evaluations were not conducted at baseline. Hence, dmfs data from the 12-month visit served as the reference value.
